# Supplementary material for: Alterations in Gene Expression and the Fatty Acid Profile Impact but Do Not Compromise the In Vitro Maturation of Zebrafish (Danio rerio) Stage III Ovarian Follicles after Cryopreservation
Source: MDPI journal article supplement (doi:10.3390/ani13223563), 2023-11-18
Supplement: s1 [file s1]

**Table S1:** Fatty acid profile of the neutral fraction (triglycerides - TG) of stage III ovarian follicles of zebrafish (*Danio rerio*).

| Fatty Acids   | Treatments   |              | <i>p</i> value |
|---------------|--------------|--------------|----------------|
|               | Control      | Vitrified    |                |
| 12:0          | 12.64 ± 6.85 | ND           | -              |
| 13:0          | 1.37 ± 0.17  | ND           | -              |
| 14:0          | 1.39 ± 0.34  | 1.25 ± 0.48  | 0.823          |
| 15:0          | 1.86 ± 0.18  | ND           | -              |
| 16:0          | 27.16 ± 2.68 | 32.18 ± 0.18 | 0.114          |
| 16:1n7        | 2.35 ± 0.23  | 3.19 ± 0.59  | 0.254          |
| 17:0          | 2.79 ± 0.57  | ND           | -              |
| 17:1          | 0.81 ± 0.11  | ND           | -              |
| 18:0          | 11.01 ± 1.14 | 8.61 ± 0.30  | 0.111          |
| 18:1n9        | 23.91 ± 1.65 | 36.30 ± 0.67 | 0.002          |
| 18:1n7        | 2.92 ± 0.36  | 2.55 ± 0.32  | 0.489          |
| 18:2n6        | 5.47 ± 0.81  | 3.77 ± 0.39  | 0.131          |
| 18:4n3        | 0.99 ± 0.16  | ND           | -              |
| 20:1n9        | ND           | 1.22 ± 0.69  | -              |
| 20:5n3        | 0.88 ± 0.09  | 1.20 ± 0.23  | 0.270          |
| 20:2n6        | ND           | 2.31 ± 0.24  | -              |
| 20:3n6        | 0.89 ± 0.11  | 0.79 ± 0.05  | 0.453          |
| 20:4n6        | 1.12 ± 0.21  | 2.05 ± 0.21  | 0.034          |
| 21:0          | 0.60 ± 0.12  | ND           | -              |
| 22:1          | ND           | 0.81 ± 0.55  | -              |
| 22:2n6        | ND           | 0.96 ± 0.29  | -              |
| 22:4n6        | ND           | 0.58 ± 0.02  | -              |
| 22:5n3        | ND           | 0.97 ± 0.41  | -              |
| 22:6n3        | 0.59 ± 0.02  | 0.87 ± 0.00  | 0.000          |
| 24:1          | 1.26 ± 0.27  | ND           | -              |
| ΣSFA          | 58.82 ± 3.40 | 42.43 ± 0.35 | 0.008          |
| ΣMUFA         | 31.25 ± 2.37 | 44.07 ± 1.49 | 0.010          |
| ΣPUFA         | 6.36 ± 0.92  | 7.83 ± 0.98  | 0.333          |
| ΣLCPUFA       | 3.58 ± 0.36  | 5.67 ± 0.86  | 0.089          |
| ΣPUFA n3      | 2.46 ± 0.18  | 3.04 ± 0.63  | 0.433          |
| ΣPUFA n6      | 7.48 ± 0.90  | 10.46 ± 1.21 | 0.119          |
| Ratio n3/n6   | 0.33 ± 0.02  | 0.28 ± 0.03  | 0.233          |
| Ratio DHA/ARA | 0.57 ± 0.11  | 0.43 ± 0.05  | 0.335          |
| Ratio ARA/EPA | 1.30 ± 0.30  | 1.79 ± 0.21  | 0.248          |
| Ratio DHA/EPA | 0.69 ± 0.08  | 0.80 ± 0.19  | 0.598          |

Values represent means ± standard error of the mean (n = 3 animals per treatment). <sup>a,b</sup> Different letters indicate statistical differences between the experimental diets by Tukey's test (*p* < 0.05), the letter a refers to the highest value while the letter b refers to the lowest. ΣSFA, ΣMUFA, ΣPUFA, ΣLC-PUFA, Σn-3 PUFA, Σn-6 PUFA are the sum of saturated fatty acids (SFA), monounsaturated (MUFA), polyunsaturated (PUFA), polyunsaturated fatty acids from long chain (LC-PUFA), n3 polyunsaturated (n-3 PUFA) and n6 polyunsaturated (n-6 PUFA), respectively. DHA/ARA is the ratio between the sum of total DHA

(docosahexaenoic acid, 22:6n-3) and ARA (arachidonic acid, 20:4n-6); ARA/EPA is the ratio between the sum of total ARA (arachidonic acid, 20:4n-6) and EPA (eicosapentaenoic acid, 20:5n-3); and DHA/EPA is the ratio between the sum of total DHA (docosahexaenoic acid, 22:6n-3) and EPA (eicosapentaenoic acid, 20:5n-3).

**Table S2:** Fatty acid profile of the polar fraction (phospholipids - PL) of stage III ovarian follicles of zebrafish (*Danio rerio*).

| Fatty Acids   | Treatments   |              | p value |
|---------------|--------------|--------------|---------|
|               | Control      | Vitrified    |         |
| 12:0          | 7.30 ± 1.23  | ND           | -       |
| 13:0          | 1.25 ± 0.12  | ND           | -       |
| 14:0          | 1.16 ± 0.13  | 0.40 ± 0.16  | 0.021   |
| 15:0          | 1.57 ± 0.24  | ND           | -       |
| 15:1          | ND           | 1.79 ± 0.01  | -       |
| 16:0iso       | 1.40 ± 0.02  | ND           | -       |
| 16:0          | 27.30 ± 1.36 | 24.79 ± 0.19 | 0.141   |
| 16:1n7        | 0.49 ± 0.08  | 0.44 ± 0.13  | 0.765   |
| 17:0          | 3.73 ± 0.55  | ND           | -       |
| 17:1          | 0.86 ± 0.05  | ND           | -       |
| 18:0          | 25.98 ± 2.64 | 23.51 ± 0.26 | 0.403   |
| 18:1n9        | 18.65 ± 1.37 | 14.64 ± 0.28 | 0.060   |
| 18:1n7        | 1.74 ± 0.15  | 1.15 ± 0.12  | 0.039   |
| 18:2n6        | 3.04 ± 0.53  | 4.86 ± 0.18  | 0.031   |
| 18:4n3        | 1.06 ± 0.29  | ND           | -       |
| 20:1n9        | ND           | 0.54 ± 0.22  | -       |
| 20:2n6        | ND           | 2.85 ± 0.05  | -       |
| 20:3n6        | 0.56 ± 0.24  | 1.91 ± 0.03  | 0.004   |
| 20:4n6        | 2.01 ± 1.16  | 10.89 ± 0.24 | 0.001   |
| 20:5n3        | ND           | 0.35 ± 0.00  | -       |
| 21:0          | 0.81 ± 0.11  | ND           | -       |
| 22:4n6        | ND           | 4.29 ± 0.02  | -       |
| 22:6n3        | 1.05 ± 0.96  | 4.62 ± 0.14  | 0.021   |
| 23:0          | ND           | 1.25 ± 0.01  | -       |
| 24:1          | 0.42 ± 0.42  | 1.73 ± 0.17  | 0.043   |
| ΣSFA          | 70.52 ± 3.45 | 49.94 ± 0.29 | 0.004   |
| ΣMUFA         | 21.76 ± 1.64 | 20.28 ± 0.57 | 0.443   |
| ΣPUFA         | 3.60 ± 0.77  | 9.62 ± 0.20  | 0.001   |
| ΣLCPUFA       | 4.12 ± 2.08  | 20.15 ± 0.08 | 0.001   |
| ΣPUFA n3      | 2.11 ± 0.93  | 4.98 ± 0.14  | 0.037   |
| ΣPUFA n6      | 5.61 ± 1.93  | 24.80 ± 0.42 | 0.000   |
| Ratio n3/n6   | 0.35 ± 0.05  | 0.20 ± 0.01  | 0.055   |
| Ratio DHA/ARA | 0.31 ± 0.20  | 0.43 ± 0.02  | 0.610   |
| Ratio ARA/EPA | ND           | 30.86 ± 0.85 | -       |
| Ratio DHA/EPA | ND           | 13.09 ± 0.31 | -       |

Values represent means  $\pm$  standard error of the mean ( $n = 3$  animals per treatment). <sup>a,b</sup> Different letters indicate statistical differences between the experimental diets by Tukey's test ( $p < 0.05$ ), the letter a refers to the highest value while the letter b refers to the lowest.  $\sum$ SFA,  $\sum$ MUFA,  $\sum$ PUFA,  $\sum$ LC-PUFA,  $\sum$ n-3 PUFA,  $\sum$ n-6 PUFA are the sum of saturated fatty acids (SFA), monounsaturated (MUFA), polyunsaturated (PUFA), polyunsaturated fatty acids from long chain (LC-PUFA), n3 polyunsaturated (n-3 PUFA) and n6 polyunsaturated (n-6 PUFA), respectively. DHA/ARA is the ratio between the sum of total DHA (docosahexaenoic acid, 22:6n-3) and ARA (arachidonic acid, 20:4n-6); ARA/EPA is the ratio between the sum of total ARA (arachidonic acid, 20:4n-6) and EPA (eicosapentaenoic acid, 20:5n-3); and DHA/EPA is the ratio between the sum of total DHA (docosahexaenoic acid, 22:6n-3) and EPA (eicosapentaenoic acid, 20:5n-3).
